# Supplementary material
Source: HighWire-hosted journal article supplement (https://nutrition.bmj.com/content/bmjnph-2024-001061)
Supplement: inline-supplementary-material-1 [file inline-supplementary-material-1.pdf]

Supplement

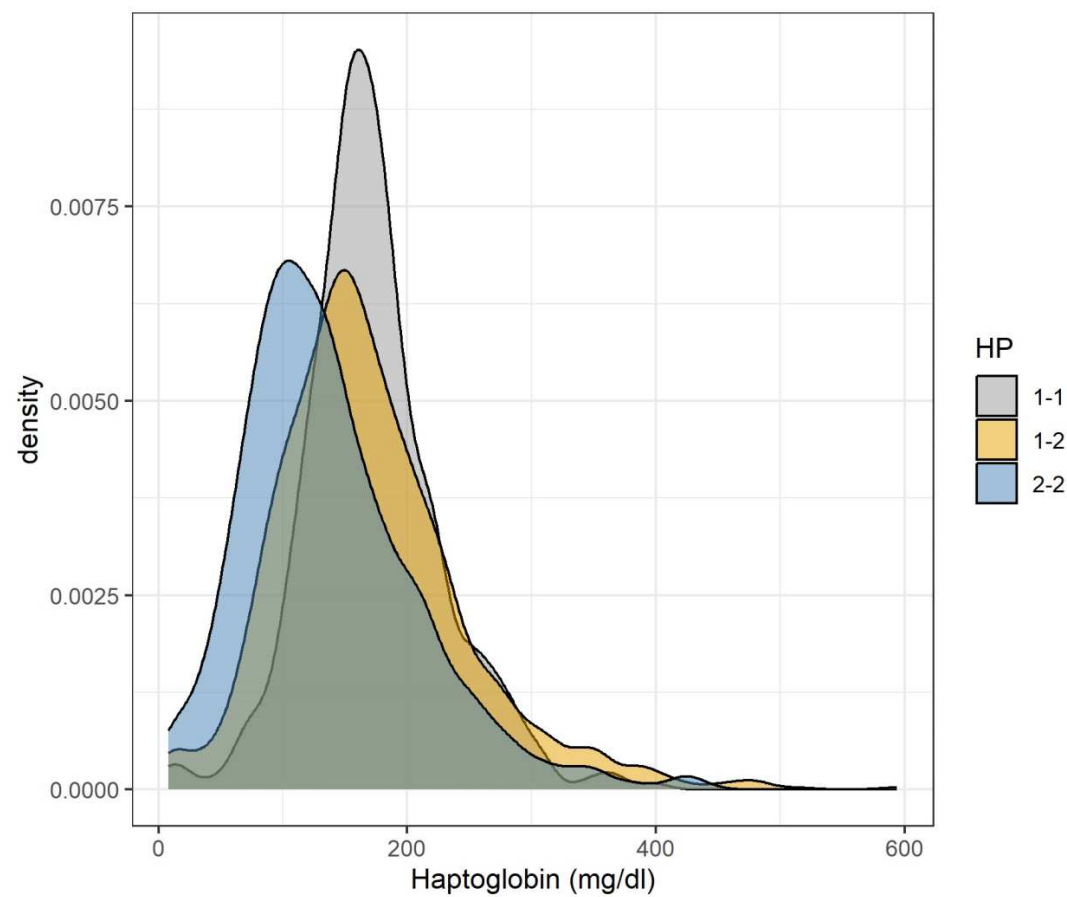

S1: Density plot of the haptoglobin distribution in the three genotype groups in the LURIC study.

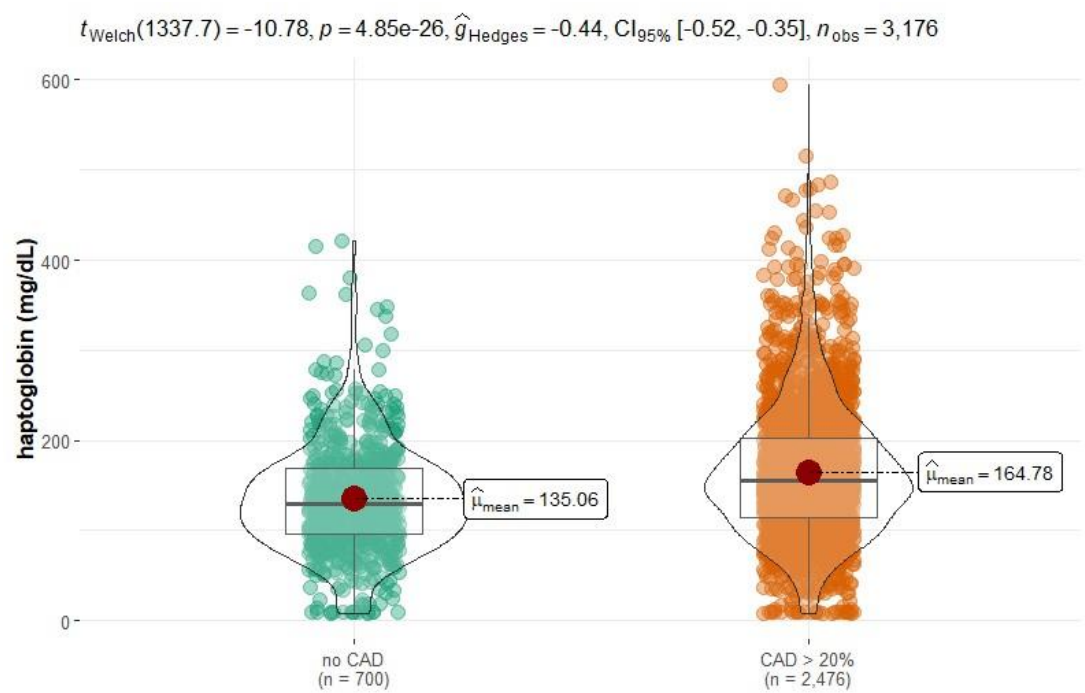

S2: Association of haptoglobin with the presence of coronary artery disease in the LURIC study.

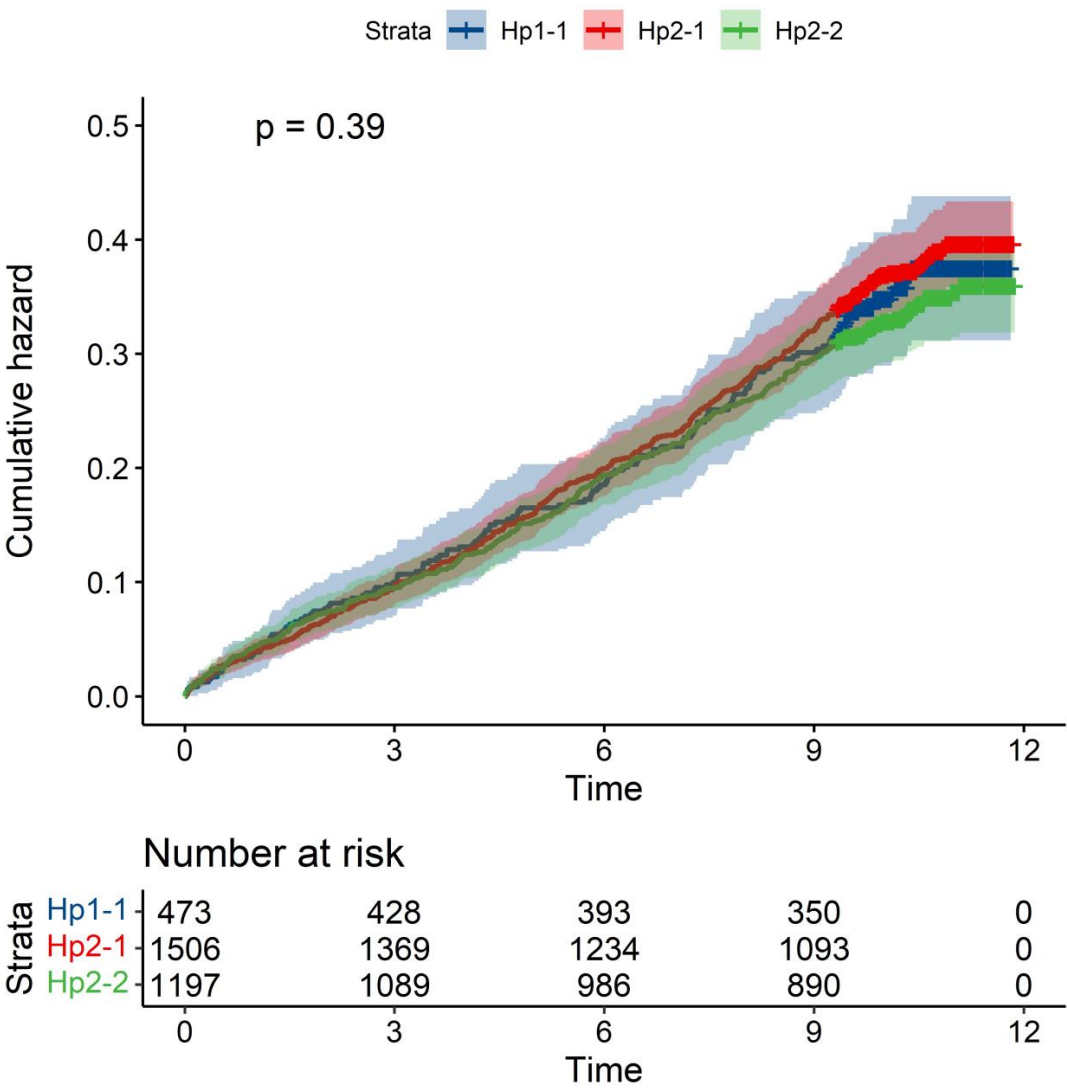

S3: Kaplan-Meier curves for all-cause mortality by HP genotype.

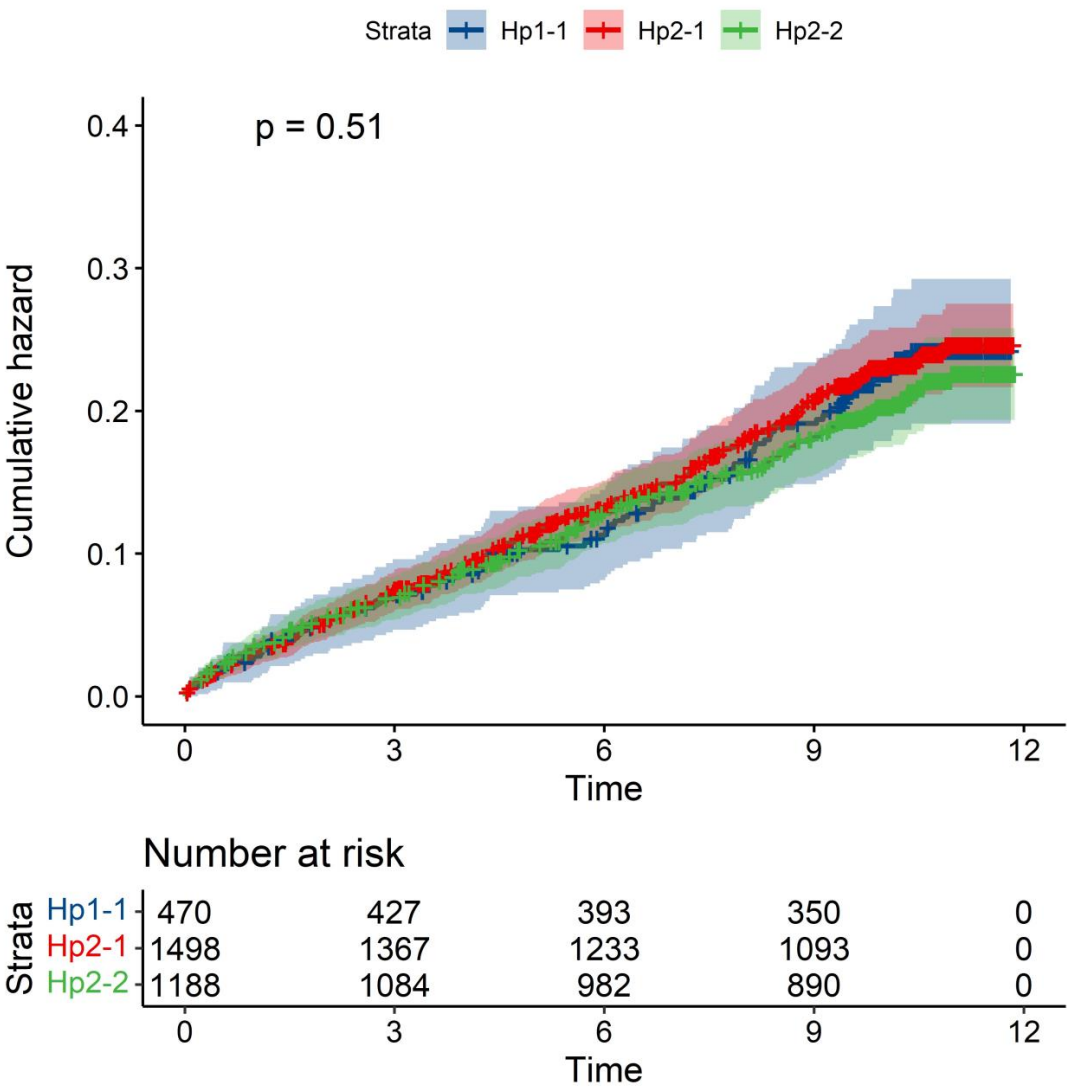

S4: Kaplan-Meier curves for cardiovascular mortality by HP genotype

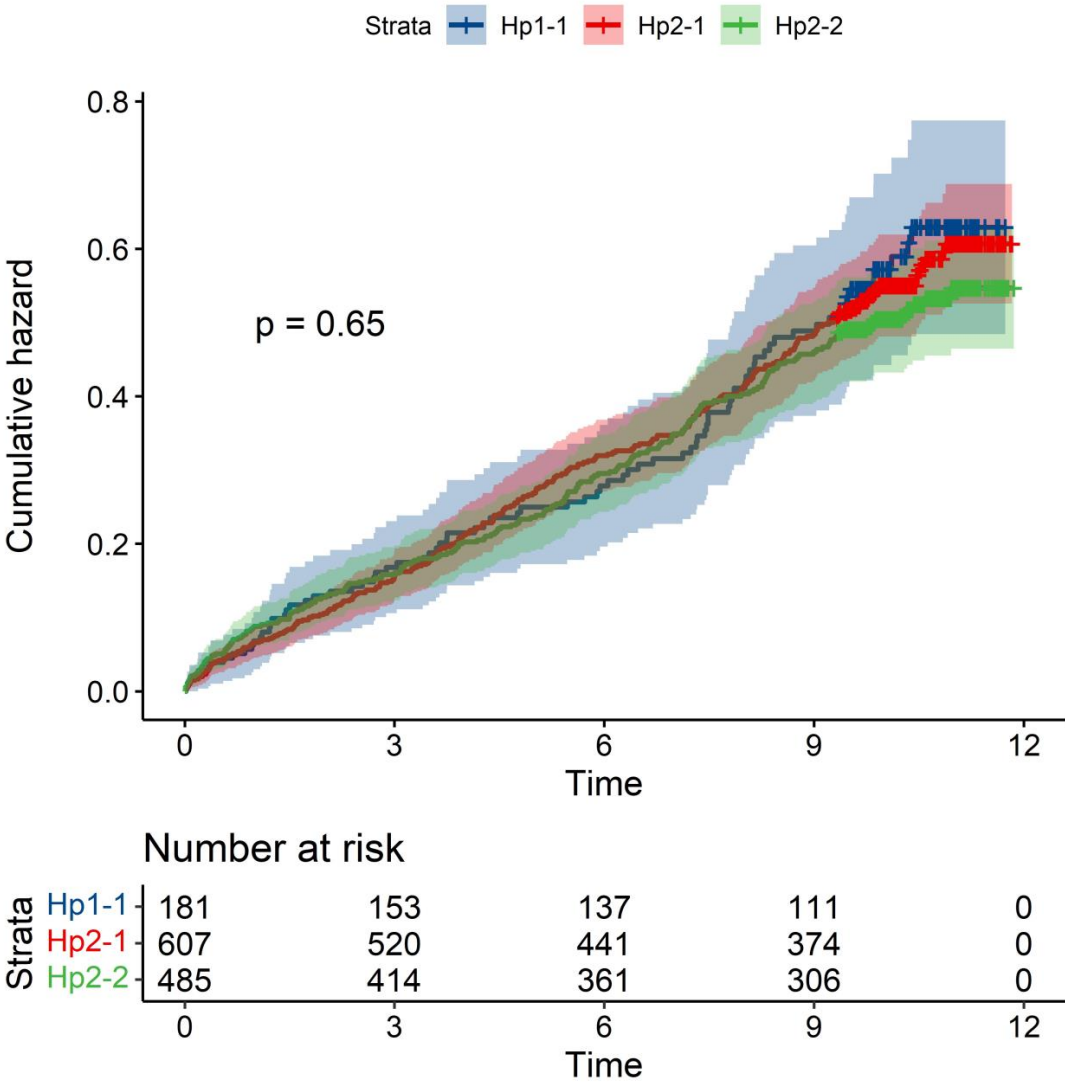

S5: Kaplan-Meier curves for all-cause mortality by HP genotype, only participant with diabetes mellitus

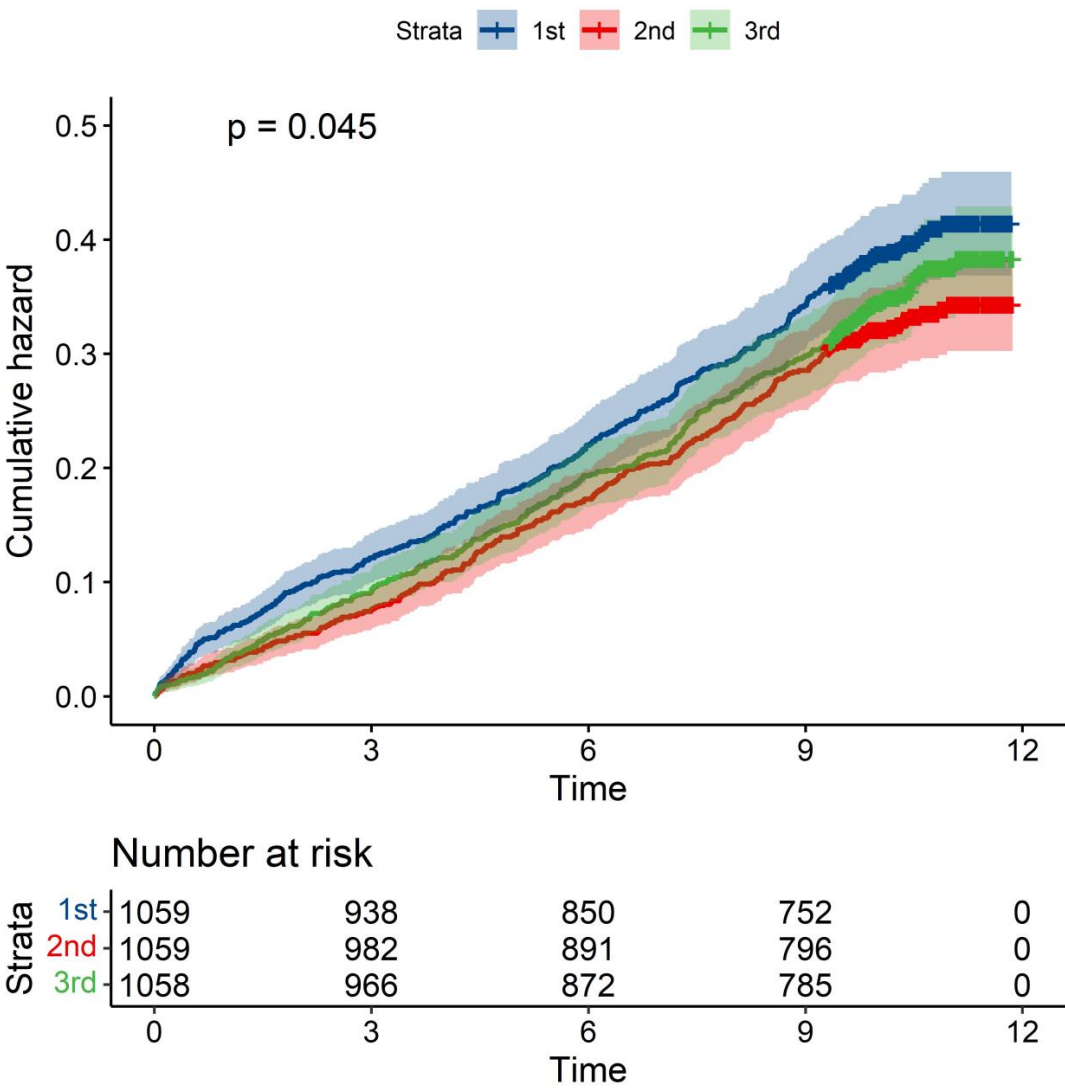

S6: Kaplan-Meier curves for all-cause mortality by alpha-tocopherol tertiles

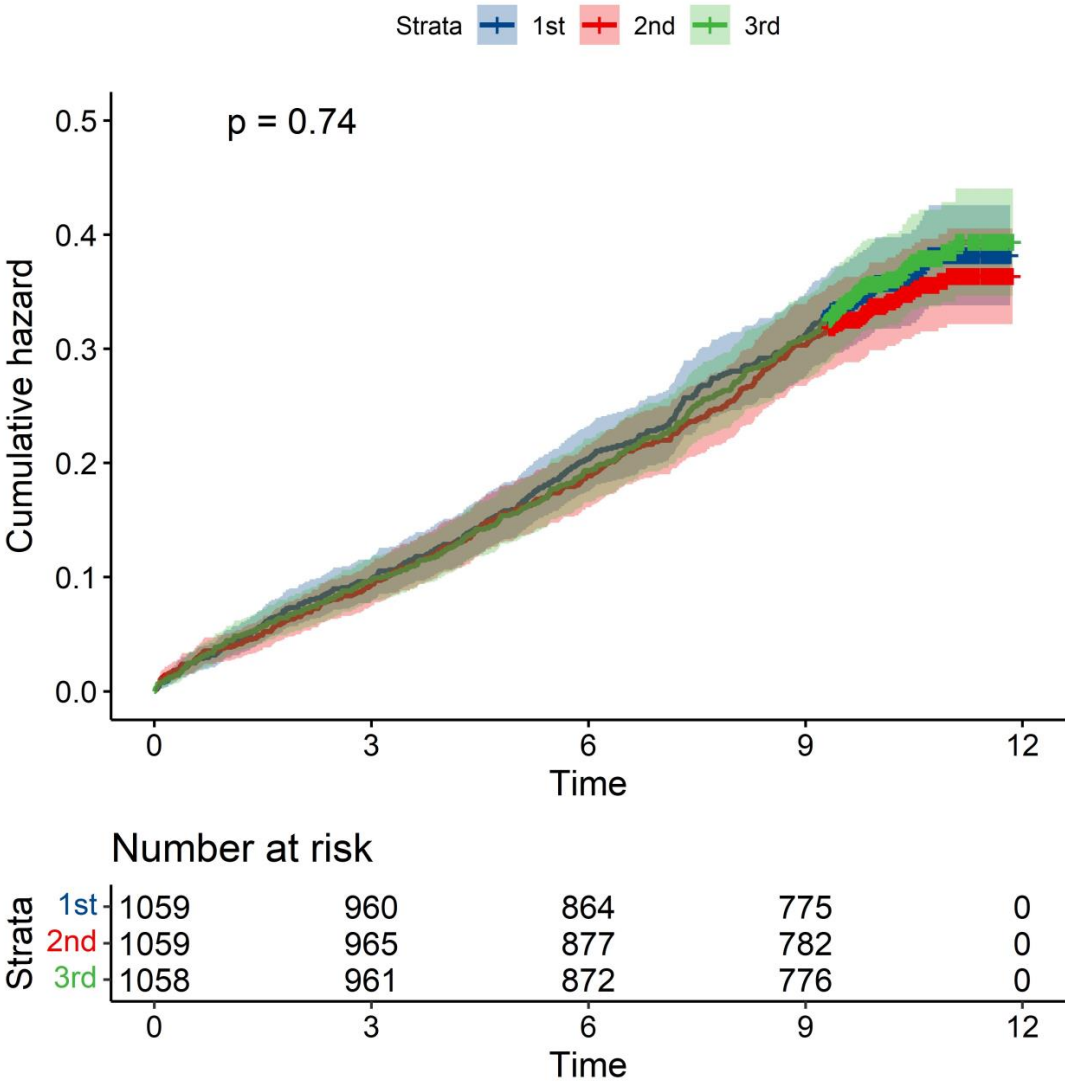

S7: Kaplan-Meier curves for all-cause mortality by gamma-tocopherol tertiles

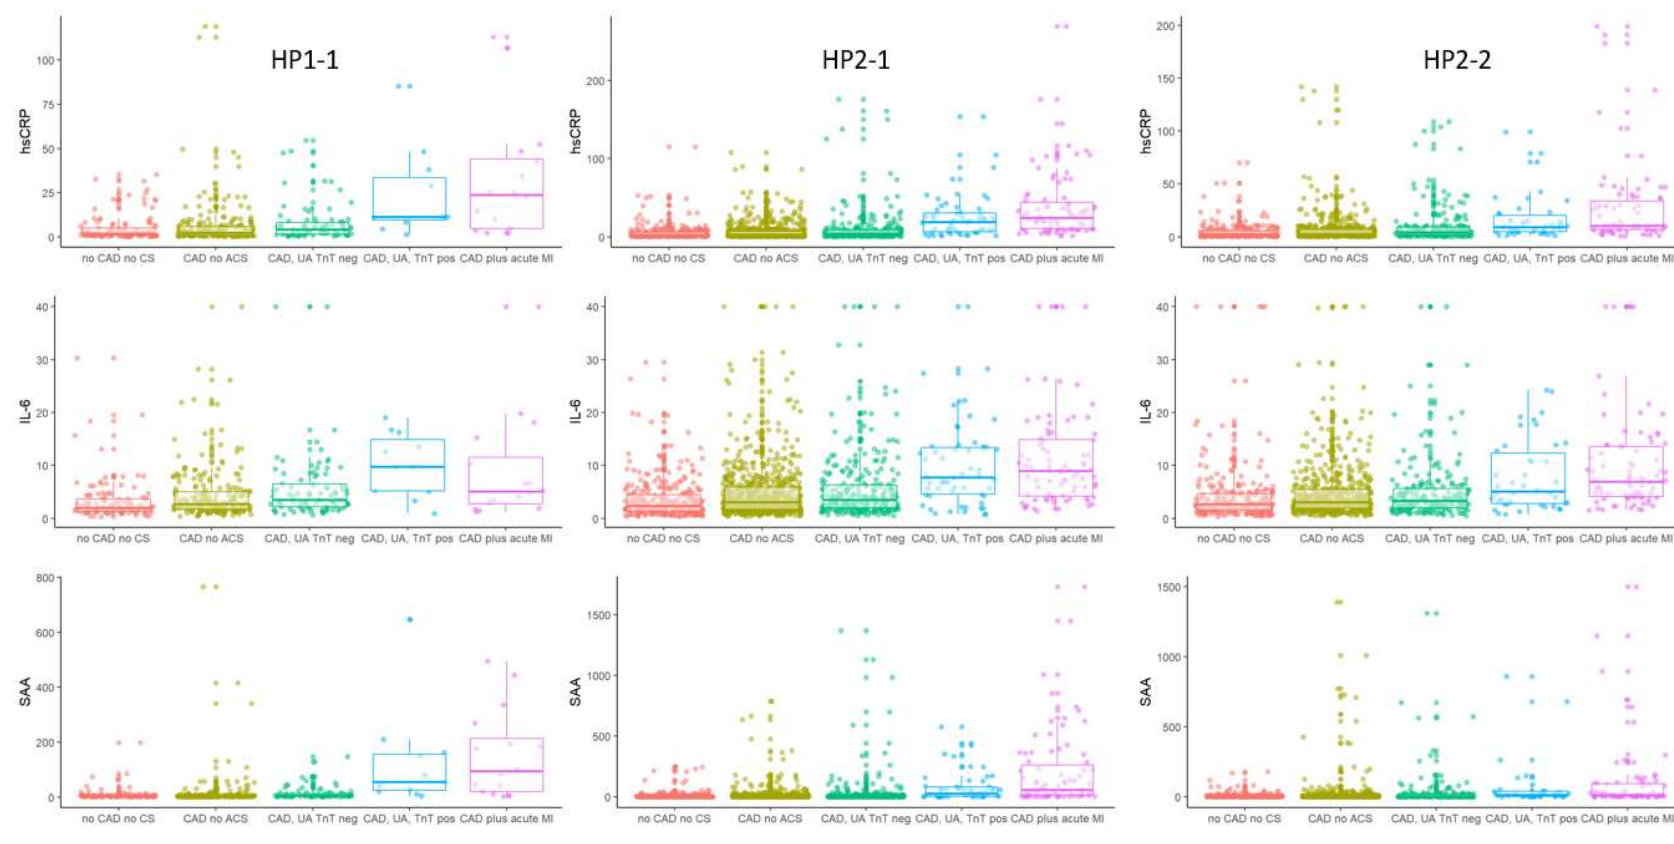

S8: Distribution of inflammation markers stratified for CAD status and HP genotype: 'high sensitive' C-reactive protein (hsCRP) upper panel, interleukin-6 (IL-6) middle panel, serumamyloid A (SAA) lower panel. ACS: acute coronary syndrome; CAD: coronary artery disease; CS: carotid stenosis; MI: myocardial infarction; UA: unstable angina; TnT: troponin T
